# Supplementary material for: The effects of ZnO nanoparticles on leaf litter decomposition under natural sunlight
Source: Royal Society of Chemistry journal article supplement (doi:10.1039/c8en01353e), 2019-01-01
Supplement: c8en01353e1.pdf [file c8en01353e1.pdf]

## Supplementary materials

**Table S1** Assay methods of extracellular enzyme activities.

| <b>Enzyme</b>           | <b>Abbreviation</b> | <b>Substrate</b>                    |
|-------------------------|---------------------|-------------------------------------|
| Acid phosphatase        | AP                  | pNP-phosphate                       |
| $\beta$ -glucosidase    | BG                  | pNP- $\beta$ -glucopyranoside       |
| Cellobiohydrolase       | CBH                 | pNP-cellobioside                    |
| N-acetylglucosaminidase | NAG                 | pNP- $\beta$ -N-acetylglucosaminide |
| Leucine-aminopeptidase  | LAP                 | leucine p-nitroanilide              |
| Glycine-aminopeptidase  | GAP                 | glycine p-nitroanilide              |
| Polyphenol oxidase      | PPO                 | L-DOPA                              |
| Peroxidase              | POD                 | L-DOPA                              |

**Fig. S1.**

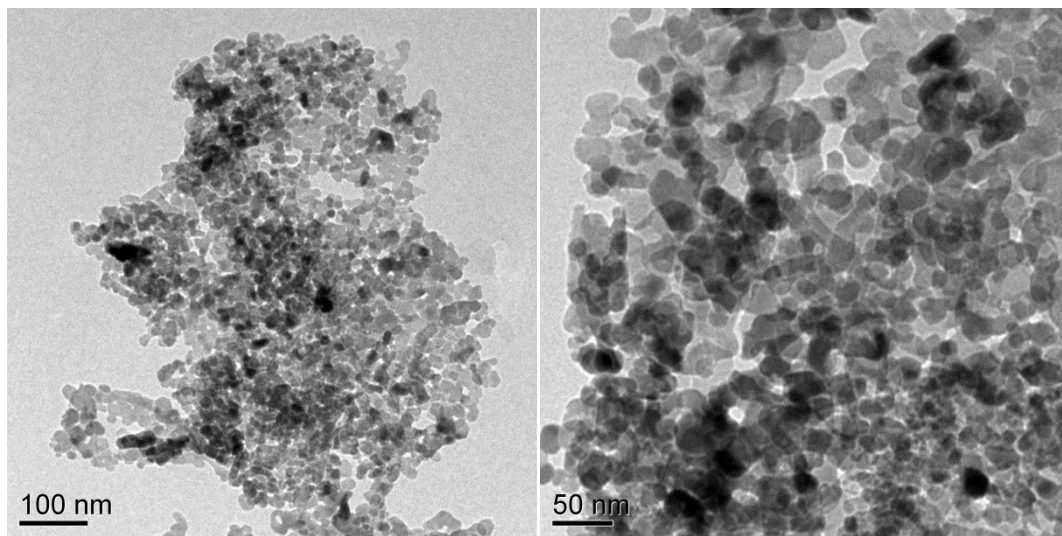

**Fig. S1.** Transmission electron microscopy images of stocks of ZnO NPs.

Fig. S2.

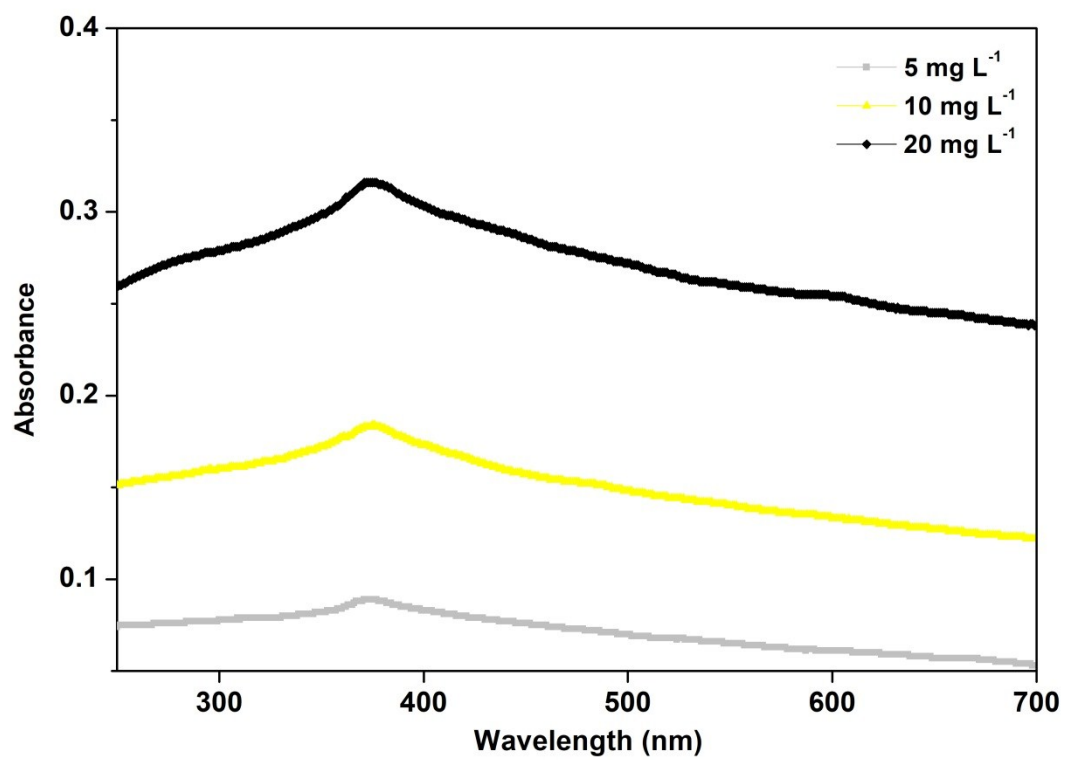

Fig. S2. UV-vis spectra of ZnO NPs in the microcosms.
